# Supplementary material for: From Pilot to Region-wide Impact: A Hybrid Implementation and Evaluation Protocol for the LEX LOTSEN OWL Care and Case Management System
Source: Research Square preprint supplement (doi:10.21203/rs.3.rs-8132959/v1), 2026-02-04
Supplement: Supplementary file 2 [file 9e87c093f344e82546348739.pdf]

## SPIRIT-Outcomes 2022 Extension items only (for separate completion of SPIRIT 2013 and SPIRIT-Outcomes 2022 items)<sup>a</sup>

| Section                                                   | Item No. | SPIRIT-Outcomes 2022 item                                                                                                                                                                                                                    | Location Reported <sup>b</sup> |
|-----------------------------------------------------------|----------|----------------------------------------------------------------------------------------------------------------------------------------------------------------------------------------------------------------------------------------------|--------------------------------|
| <b>Methods: Participants, interventions, and outcomes</b> |          |                                                                                                                                                                                                                                              |                                |
| <b>Outcomes</b>                                           | 12.1     | Provide a rationale for the selection of the domain for the trial's primary outcome                                                                                                                                                          |                                |
|                                                           | 12.2     | If the analysis metric for the primary outcome represents within-participant change, define and justify the minimal important change in individuals                                                                                          |                                |
|                                                           | 12.3     | If the outcome data collected are continuous but will be analyzed as categorical (method of aggregation), specify the cutoff values to be used                                                                                               |                                |
|                                                           | 12.4     | If outcome assessments will be performed at several time points after randomization, state the time points that will be used for analysis                                                                                                    |                                |
|                                                           | 12.5     | If a composite outcome is used, define all individual components of the composite outcome                                                                                                                                                    |                                |
| <b>Sample size</b>                                        | 14.1     | Define and justify the target difference between treatment groups (eg, the minimal important difference)                                                                                                                                     |                                |
| <b>Methods: Data collection, management, and analysis</b> |          |                                                                                                                                                                                                                                              |                                |
| <b>Data collection methods</b>                            | 18a.1    | Describe what is known about the responsiveness of the study instruments in a population similar to the study sample                                                                                                                         |                                |
|                                                           | 18a.2    | Describe who will assess the outcome (eg, nurse, parent)                                                                                                                                                                                     |                                |
| <b>Statistical methods</b>                                | 20a.1    | Describe any planned methods to account for multiplicity in the analysis or interpretation of the primary and secondary outcomes (eg, coprimary outcomes, same outcome assessed at multiple time points, or subgroup analyses of an outcome) |                                |

<sup>a</sup>It is strongly recommended that this checklist be read in conjunction with the SPIRIT (Standard Protocol Items: Recommendations for Interventional Trials) Statement paper for important clarification on the items. Amendments to the protocol should be tracked and dated. The SPIRIT checklist is copyrighted by the SPIRIT Group under the Creative Commons "Attribution-NonCommercial-NoDerivs 3.0 Unported" license and is reproduced with permission.

<sup>b</sup>Indicates page numbers and/or manuscript location: to be completed by authors during trial protocol development.
